# Supplementary material for: Stereochemistry of rHint1 hydrolase assisted cleavage of P–N bond in nucleoside 5′-O-phosphoramidothioates
Source: Royal Society of Chemistry journal article supplement (doi:10.1039/b615160d), 2007-01-01
Supplement: b615160d.pdf [file b615160d.pdf]

## Supplementary Information

### Stereochemistry of rHint1 Hydrolase Assisted Cleavage of P-N Bond in Nucleoside 5'-O-phosphoramidothioates

Agnieszka Krakowiak<sup>†</sup>, Renata Kaczmarek<sup>†</sup>, Janina Baraniak<sup>†</sup>, Michał Wieczorek<sup>‡</sup> and Wojciech J. Stec<sup>†\*</sup>.

<sup>†</sup>Department of Bioorganic Chemistry, Centre of Molecular and Macromolecular Studies, Polish Academy of Sciences, 112 Sienkiewicza Str., 90-363 Łódź, <sup>‡</sup>Institute of Chemistry and Environmental Protection, Pedagogical University of Częstochowa, Al. Armii Krajowej 13/15, 42-200 Częstochowa, Poland

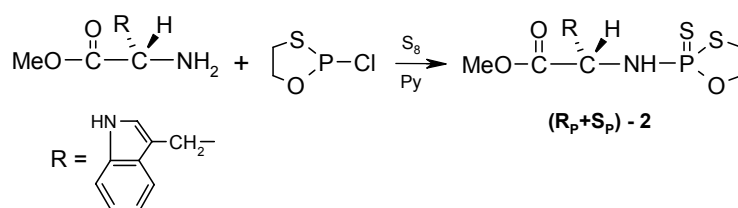

#### Synthesis of N-(2-Thiono-1,3,2-oxathiaphospholanyl)-L-tryptophan Methyl Ester (**2**)<sup>1</sup>

Elemental sulfur (512 mg, 2 mmol) was added to a solution of L-tryptophan methyl ester hydrochloride (254 mg, 1 mmol) in of dry pyridine (5 mL). 2-Chloro-1,3,2-oxathiaphospholane<sup>2</sup> (142 mg, 1 mmol) was then added dropwise. The reaction mixture was stirred at rt for 12 h. The solvent was then removed under reduced pressure and acetonitrile (10 mL) was added and an excess of sulfur was filtered off. After evaporation of the solvent the residue was dissolved in chloroform (2-3 mL) and applied to a silica gel column (200-300 mesh, 2.5 x 18 cm). The column was eluted with chloroform and appropriate fractions were combined and evaporated under reduced pressure to give the desired product as a mixture of diastereoisomers **2** (267 mg, 75%); <sup>31</sup>P NMR (121MHz, CDCl<sub>3</sub>) δppm 96.54 and 95.52. FAB-MS m/z 355 (M-1); <sup>1</sup>H NMR (300MHz, CDCl<sub>3</sub>) δppm: 8.09 (bs, 1H), 7.57 (d, 1H), 7.39- 7.35 (m, 1H), 7.24- 7.06 (m, 3H), 4.38- 4.06 (m, 4H), 3.67 (s, 3H), 3.44- 3.26 (m, 4H).

The diastereoisomers of **2** were separated by fractional crystallization from chloroform to give the less-soluble isomer **R<sub>p</sub>-2**, resonating at lower field [δ<sub>p</sub> (121MHz, CDCl<sub>3</sub>) 96.54ppm]. Crystals of this diastereoisomer were suitable for X-ray analysis which proved the R-configuration at phosphorus. The mother liquors were concentrated and the solid residue was crystallised from chloroform-diethyl ether (10:1) to give the pure diastereomer of **S<sub>p</sub>-2** resonating at higher field [δ<sub>p</sub> (121MHz, CDCl<sub>3</sub>) 95.52 ppm].

### **Synthesis of Adenosine 5'-O-[N-(L-tryptophanamide)]phosphoramidothioates (1).**

The individual diastereoisomers of *N*-(2-thiono-1,3,2-oxathiaphospholanyl)-L-tryptophan methyl ester (**2**, 356 mg, 1mmol) were separately dissolved in dry acetonitrile (5 mL) and into this solution was dropped a solution of *N*<sup>6</sup>,*O*<sup>2'</sup>,*O*<sup>3'</sup>-tribenzoyladenosine (579 mg, 1 mmol) and DBU (167 mg, 1.1 mmol) in dry acetonitrile (6 mL). The reaction mixture was stirred at rt for 12 h then concentrated under reduced pressure. The residual solid was suspended in aqueous ammonia (10 ml, 20% v/v) and left for 24 h at rt in a tightly closed vial. Ammonia was then evaporated and the residue dissolved in water and purified on a Sephadex A-25 column (3 x 20 cm): product **1** being eluted with a linear gradient of triethylammonium bicarbonate buffer (pH 7.5) from 0.05 to 0.4 M. The appropriate fractions were combined and evaporated to yield the oily product, which was dissolved in water and passed through a Dowex 50Wx2 (Na<sup>+</sup>) column (1.5 x10 cm). Fractions containing the product were combined and lyophilized to provide **1** as a colorless solid.

#### **S<sub>P</sub>-1 (prepared from R<sub>P</sub>-2)**

(389 mg, 71.0%); <sup>31</sup>P NMR (121MHz, D<sub>2</sub>O,) δppm 55.65; <sup>1</sup>H NMR (300MHz, D<sub>2</sub>O,) δppm: 8.20 (1H, s), 8.08 (1H, s), 7.32 (1H, d), 7.12 (1H, d), 7.03 (1H, s), 6.84 (1H, t), 6.67 (1H, t), 5.82 (1H, d), 4.44 (1H, m), 4.12 (2H, m), 3.80 (2H, m), 3.71 (1H, m), 2.97 (2H, m); HRFAB-MS m/z calcd for (M-H)<sup>-</sup> 547.1954, found 547.1942.

#### **R<sub>P</sub>-1 (obtained from S<sub>P</sub>-2)**

(408 mg, 74.5%); <sup>31</sup>P NMR (121 MHz, D<sub>2</sub>O,) δppm 57.96; <sup>1</sup>H NMR (300 MHz, D<sub>2</sub>O,) δppm: 8.28 (1H, s), 8.06 (1H, s), 7.32 (1H, d), 7.13 (1H, d), 7.02 (1H, s), 6.85 (1H, t), 6.69 (1H, t), 5.82 (1H, d), 4.50 (1H, m), 4.16 (2H, m), 3.94 (1H, m), 3.70 (2H, m), 2.97 (2H, m); HRFAB-MS m/z calcd for (M-H)<sup>-</sup> 547.1954, found 547.1940.

## Crystallographic analysis of **2**

The crystal and molecular structure of *N*-(2-thiono-1,3,2-oxathiaphospholanyl)-*L*-tryptophan methyl ester **2**, ( $\delta_P$  96.54 isomer) was determined using data collected at low temperature on a KUMA (Oxford Instruments KM4) diffractometer<sup>3</sup> with graphite monochromatized MoK $\alpha$  radiation. Compound **R<sub>P</sub>-2** crystallises in monoclinic system in space group P2<sub>1</sub> with 2 molecules per unit cell. Crystal data and experimental details are shown in Table 1. The lattice constants were refined by least-squares fit of 5000 reflections in the  $\theta$  range 3.53°-28.53°.

A total of 3476 independent reflections with  $I \geq 0$  were used to solve the structure by direct methods<sup>4,5</sup> and to refine it by full matrix least-squares using F<sup>2</sup>. Hydrogen atoms were found on difference Fourier map and refined isotropically. Anisotropic thermal parameters were refined for all non-hydrogen atoms. The final refinement converged to R = 0.0204 for 268 refined parameters and 3417 observed reflections with  $I \geq 2\sigma(I)$ . The absolute configurations at the chiral atoms were established as  $R_{P1}$ ,  $S_{C3}$ . The absolute structure was determined by the Flack method<sup>6</sup> with result  $\chi = 0.03(4)$ . Data processing was carried out with the KM4CCD software<sup>3,7</sup> structure solution SHELXS<sup>4</sup> structure refinement SHELXL<sup>5</sup>.

The authors have deposited all crystallographic data for this structure with the Cambridge Crystallographic Data Centre<sup>8</sup>.

**Table 1.** Crystal data for **2**

|                                     |                                                                              |
|-------------------------------------|------------------------------------------------------------------------------|
| Molecular formula                   | C <sub>14</sub> H <sub>17</sub> N <sub>2</sub> O <sub>3</sub> S <sub>2</sub> |
| Formula weight                      | 356.39                                                                       |
| Temperature (K)                     | 173(1)                                                                       |
| Wavelength (Å)                      | 0.71073                                                                      |
| Crystallographic system             | monoclinic                                                                   |
| Space group                         | P2 <sub>1</sub>                                                              |
| a (Å)                               | 8.4537(6)                                                                    |
| b (Å)                               | 9.5906(7)                                                                    |
| c (Å)                               | 10.0814(8)                                                                   |
| $\alpha$ (°)                        | 90.00                                                                        |
| $\beta$ (°)                         | 104.847(6)                                                                   |
| $\gamma$ (°)                        | 90.00                                                                        |
| V (Å <sup>3</sup> )                 | 790.07(10)                                                                   |
| Z                                   | 2                                                                            |
| D <sub>c</sub> (g/cm <sup>3</sup> ) | 1.498                                                                        |

|                                           |                            |                  |
|-------------------------------------------|----------------------------|------------------|
| $\mu$ [cm <sup>-1</sup> ]                 |                            | 4.51             |
| Crystal dimensions (mm)                   |                            | 0.20x0.55x0.65   |
| Maximum 2 $\theta$ ( $^\circ$ )           |                            | 57.06            |
| Scan mode                                 |                            | $\omega$         |
| <i>hkl</i> ranges:                        | <i>h</i> =                 | -11 10           |
|                                           | <i>k</i> =                 | -12 12           |
|                                           | <i>l</i> =                 | -9 13            |
| No. of reflections: unique                |                            | 3476             |
|                                           | with $I > 0\sigma(I)$      | 3476             |
|                                           | obs. with $I > 2\sigma(I)$ | 3417             |
| No. of parameters refined                 |                            | 268              |
| Largest diff. peak (e $\text{\AA}^{-3}$ ) |                            | 0.205            |
| Largest diff. hole (e $\text{\AA}^{-3}$ ) |                            | -0.227           |
| shift/esd max                             |                            | 0.001            |
| $R_{\text{obs}}$                          |                            | 0.0204           |
| $wR_{\text{obs}}$                         |                            | 0.0530           |
| $S_{\text{obs}}$                          |                            | 1.046            |
| weighting coeff.*                         | m                          | 0.0319           |
|                                           | n                          | 0.1732           |
| extinction coef.**                        | k                          | 0.0208(22)       |
| $R_{\text{int}}$                          |                            | 0.0230           |
| $T_{\text{meas.}}$                        |                            | 110(2)           |
| F(000)                                    |                            | 372              |
| Absolute structure                        |                            | $S_{P1}, S_{C3}$ |
| Flack parameter $\chi$                    |                            | 0.03(4)          |

\* weighting scheme  $w = [\sigma^2(F_o^2) + (mP)^2 + nP]^{-1}$   
 where  $P = (F_o^2 + 2F_c^2)/3$

\*\* extinction method SHELXL,  
 extinction expression  $F_c^* = kF_c [1 + 0.001xF_c^2\lambda^3/\sin(2\theta)]^{-1/4}$

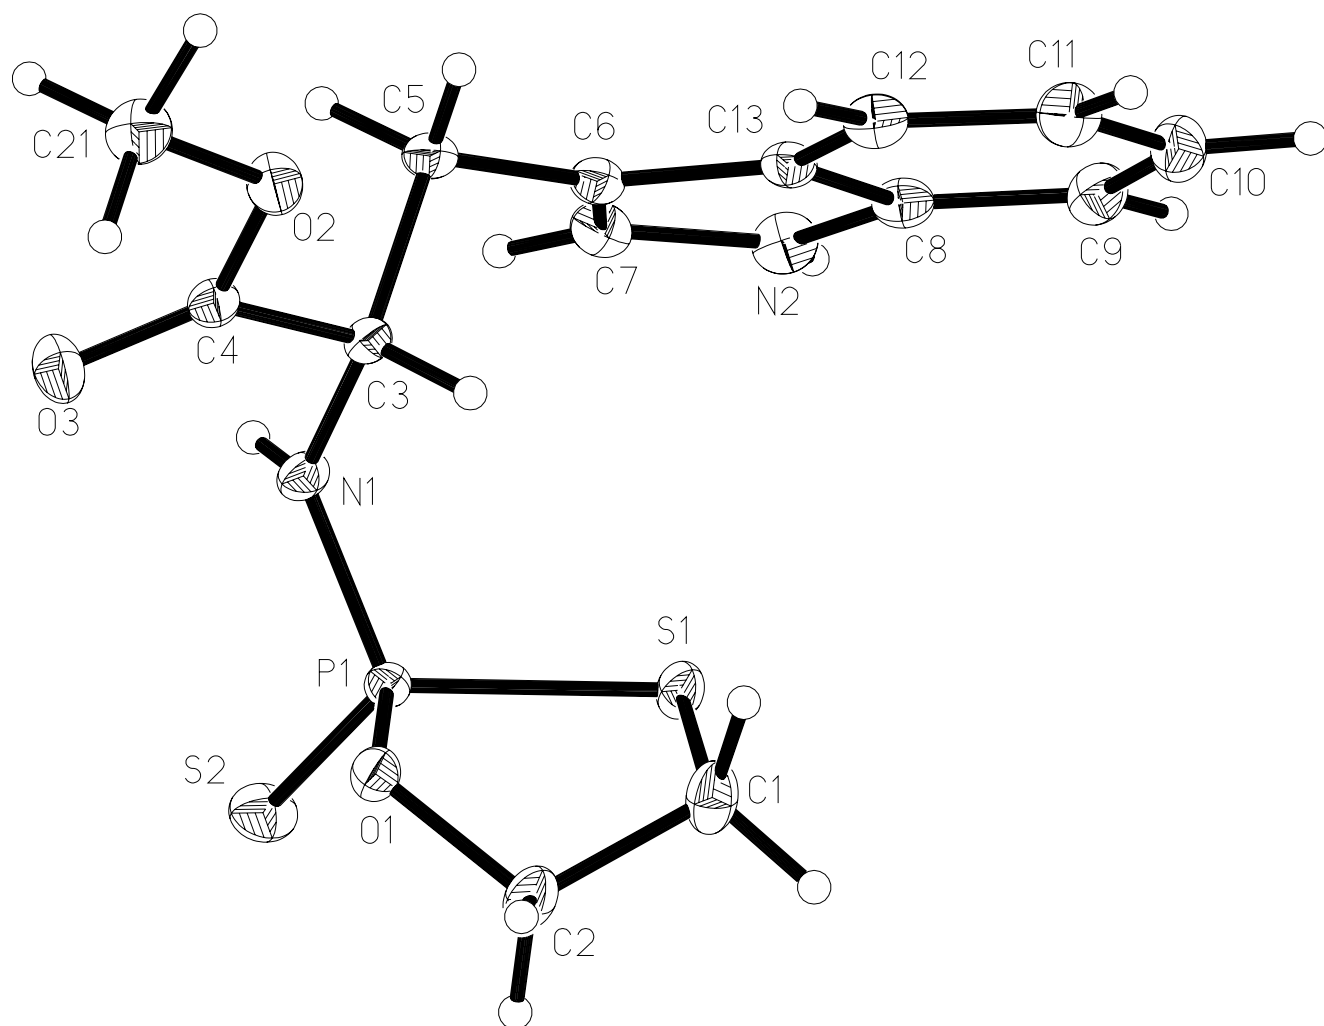

**Figure 1.** Thermal ellipsoidal view with the atom numbering scheme for Rp-2. Ellipsoids are shown with 50% probability.

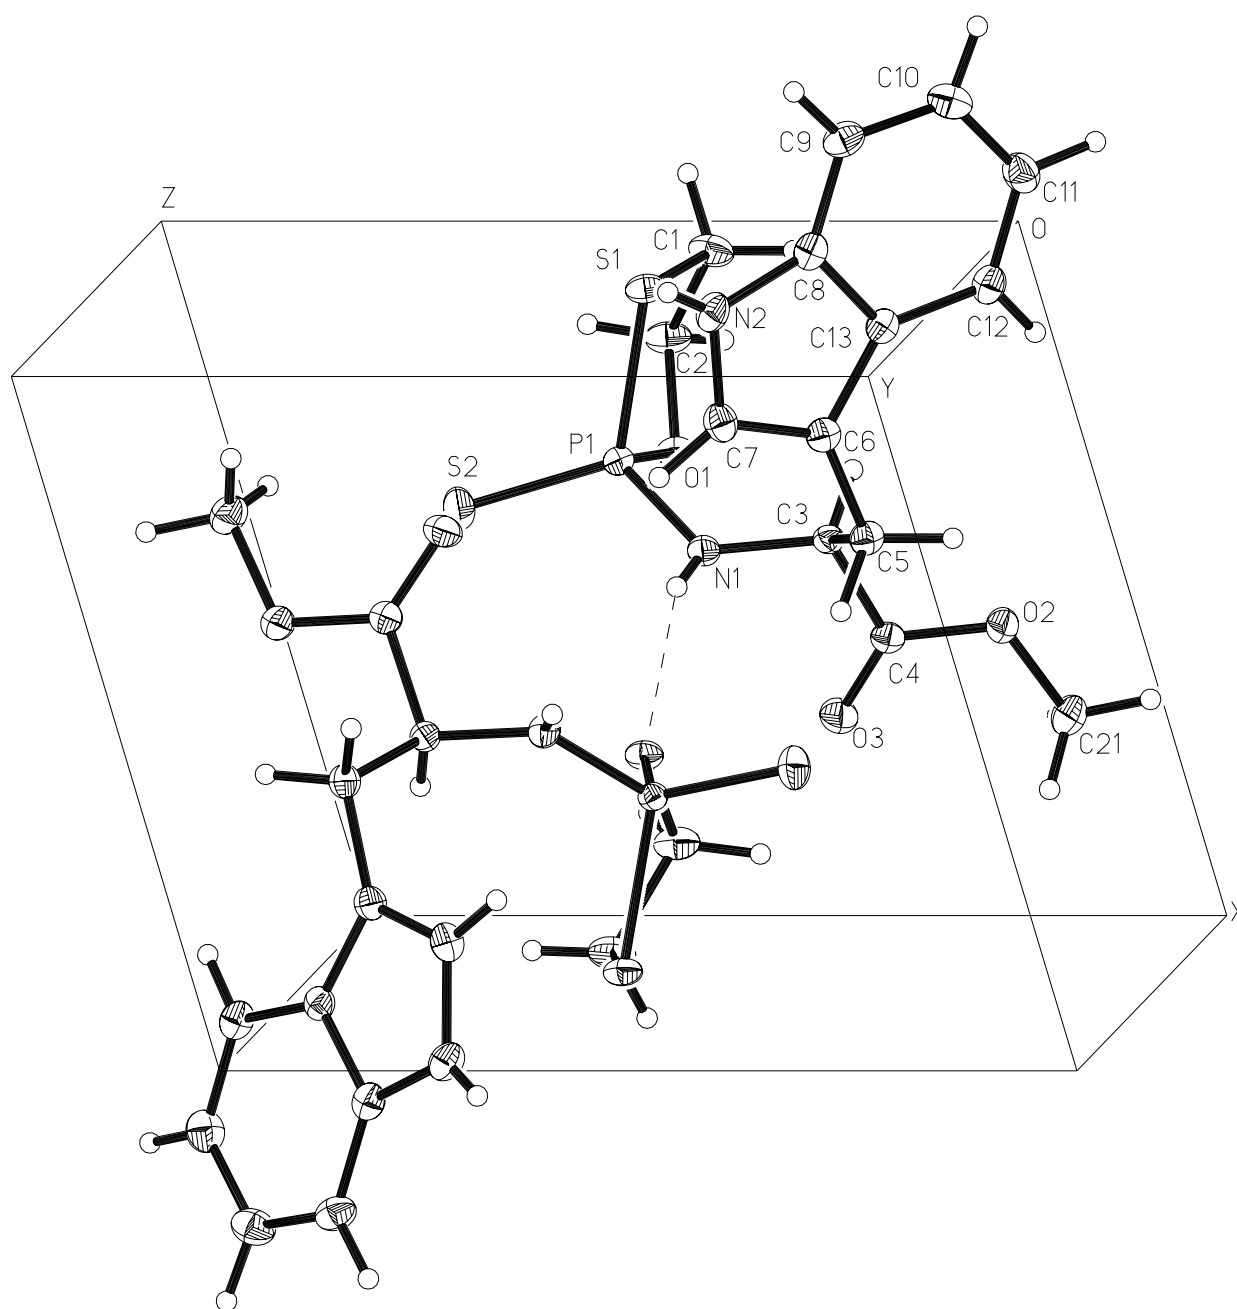

**Figure 2.** Crystal packing diagram for R<sub>P</sub>-2. Ellipsoids are shown with 50% probability.

## References

- (1) Baraniak J., Kaczmarek R., Korczyński D., Wasilewska E.: *J. Org. Chem.* **2002**, *67*, 7267.
- (2) Stec, W.J.; Grajkowski, A.; Karwowski, B.; Kobylańska, A.; Koziółkiewicz, M.; Misiura, K.; Okruszek, A.; Wilk, A.; Guga, P.; Boczkowska, M. *J. Am. Chem. Soc.* **1995**, *117*, 12019..
- (3) KM4CCD software. Data Collection Program. CrysAlis CCD. Version 1.163, **2000**, UNILIC & KUMA Diffraction Instruments GmbH.
- (4) Sheldrick, G.M.; Kruger, G. M.; Goddard, R. SHELXS-86. Crystallographic Computing 5, Oxford, **1985**.
- (5) Sheldrick, G. M. SHELXL-93. Structure Refinement Program. *J. Appl. Cryst.* **1993**
- (6) Flack, H. D. *Acta Cryst.* **1983**, *A39*, 876-881.
- (7) KM4CCD software. Data Reduction Program. CrysAlis RED. Version 1.163, **2000**, UNILIC & KUMA Diffraction Instruments GmbH
- (8) Deposition number: CCDC 614931, Cambridge Crystallographic Data Centre, 12 Union Road, Cambridge CB2 1EZ, (UK).
